# Supplementary material for: Development of the Ultralight Hybrid Pneumatic Artificial Muscle: Modelling and optimization
Source: PubMed Central journal article supplement (PMC8062031; doi:10.1371/journal.pone.0250325), 2021-04-22
Supplement: pone.0250325.s001.pdf [file pone.0250325.s001.pdf]

**S1 Table. Parameters of the skin Mooney-Rivlin hyperelastic model.**

| <b>Parameters</b> | <b>Dimensions [Pa]</b> |
|-------------------|------------------------|
| C10               | $-2.1242 \cdot 10^5$   |
| C01               | $2.2114 \cdot 10^5$    |
| C20               | $1.1528 \cdot 10^7$    |
| C11               | $-2.4705 \cdot 10^7$   |
| C02               | $1.3631 \cdot 10^7$    |
| C30               | 72.253                 |
| C21               | -1583                  |
| C12               | $-2.8688 \cdot 10^6$   |
| C03               | $1.8054 \cdot 10^6$    |
